# Supplementary material for: Network Formation via Anion Coordination: Crystal Structures Based on the Interplay of Non-Covalent Interactions
Source: PubMed Central journal article supplement (PMC6017772; doi:10.3390/molecules23030572), 2018-03-03
Supplement: molecules-23-00572-s001.pdf [file molecules-23-00572-s001.pdf]

# Network Formation via Anion Coordination: Crystal Structures Based on the Interplay of Non-Covalent Interactions.

Matteo Savastano, Carla Bazzicalupi, Palma Mariani and Antonio Bianchi

## Supplementary Materials

### CSD search details

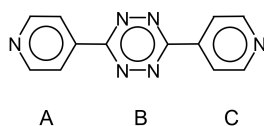

The CSD – system 2017 (version 5.38) has been investigated for ligand L as shown in figure.

The following geometric parameters have been defined:

plane 1: all non-H atoms in pyridine ring A

plane 2: all non-H atoms in pyridine ring C

plane 3: all non-H atoms in pyridine rings A and C

plane 4: all non-H atoms in tetrazine ring B

angle 1: dihedral angle between plane 1 and plane 2

angle 2: dihedral angle between plane 3 and plane 4

**Table S1.** H<sub>2</sub>L(CF<sub>3</sub>CO<sub>2</sub>)<sub>2</sub>: non-H atom...non-H atom distances (Å) and corresponding distances from hydrogen atoms for contacts discussed in the text (e.s.d. in parenthesis).

| <b>X-H...Y</b> | <b>X...Y distance (Å)</b> | <b>H...Y distance (Å)</b> |
|----------------|---------------------------|---------------------------|
| N3-H...O1      | 2.577(2)                  | 1.56(2)                   |
| C5-H...O1      | 3.239(2)                  | 2.311(1)                  |
| C4-H...O2      | 3.155(2)                  | 2.534(1)                  |

**Table S2.** H<sub>2</sub>L(Ph<sub>2</sub>PO<sub>4</sub>)<sub>2</sub>: non-H atom...non-H atom distances (Å) and corresponding distances from hydrogen atoms for contacts discussed in the text (e.s.d. in parenthesis).

| <b>X-H...Y</b> | <b>X...Y distance (Å)</b> | <b>H...Y distance (Å)</b> |
|----------------|---------------------------|---------------------------|
| N1-H...O2      | 2.544(3)                  | 1.46(3)                   |
| C4-H...O2      | 3.113(4)                  | 2.324(2)                  |
| C10-H...C16    | 3.725(4)                  | 2.898(3)                  |
| C11-H...C17    | 3.587(5)                  | 2.831(4)                  |
